# Supplementary material
Source: MDPI journal article supplement (https://www.mdpi.com/2073-4433/10/12/738)
Supplement: s1 [file s1]

# Supplementary Materials:

Jianping Duan <sup>1,\*</sup>, Peili Wu <sup>2</sup> and Zhuguo Ma <sup>1,3</sup>

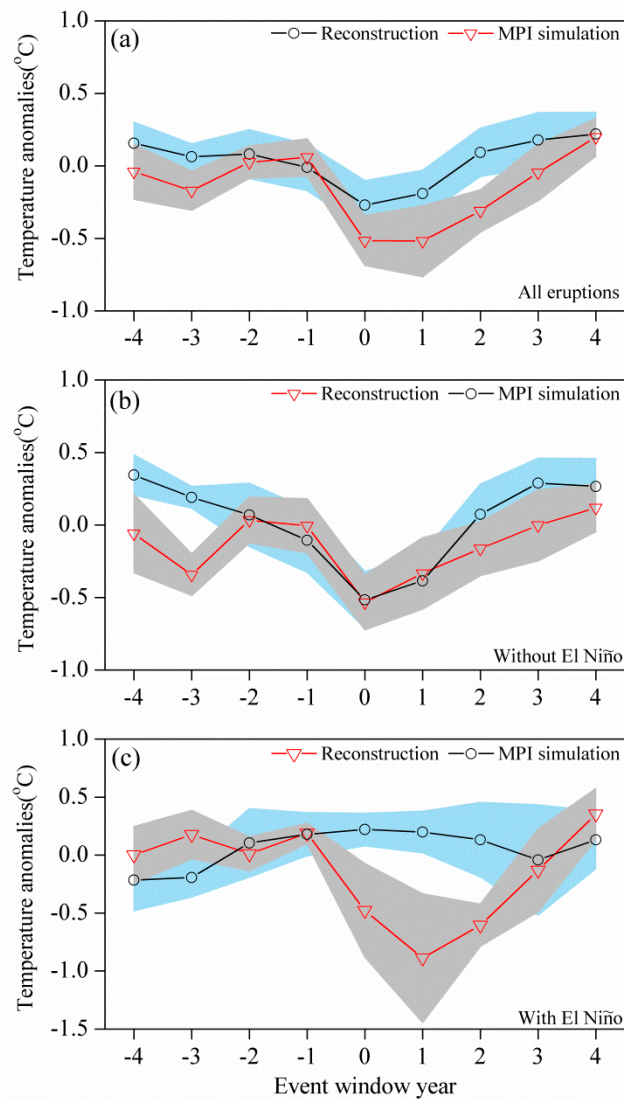

**Figure S1.** Comparisons between the composite magnitudes of post-volcanic August-September cooling over the TP derived from the tree-ring density-based reconstruction and simulation from MPI model. The composite magnitude was based on (a) all the twelve large tropical eruptions, (b) the eight large tropical eruptions without El Niño associations and (c) the four large tropical eruptions accompanied by a subsequent El Niño event. Temperature anomalies in (a-c) are with respect to the preceding 5-year mean. The shaded areas denote the error bar (SE).

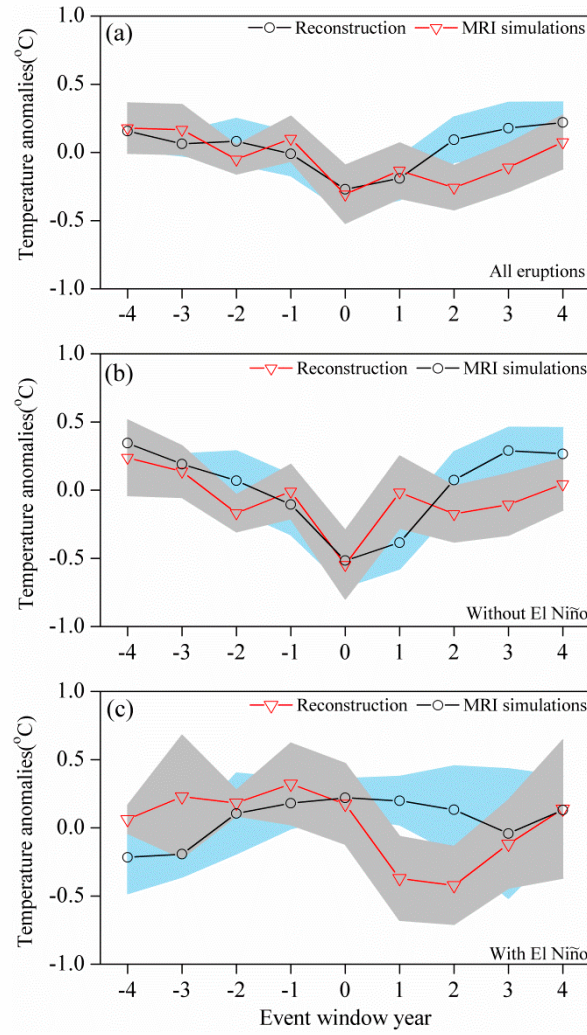

**Figure S2.** Comparisons between the composite magnitudes of post-volcanic August-September cooling over the TP derived from the tree-ring density-based reconstruction and simulation from MRI model. The composite magnitude was based on (a) all the twelve large tropical eruptions, (b) the eight large tropical eruptions without El Niño associations and (c) the four large tropical eruptions accompanied by a subsequent El Niño event. Temperature anomalies in (a-c) are with respect to the preceding 5-year mean. The shaded areas denote the error bar (SE).

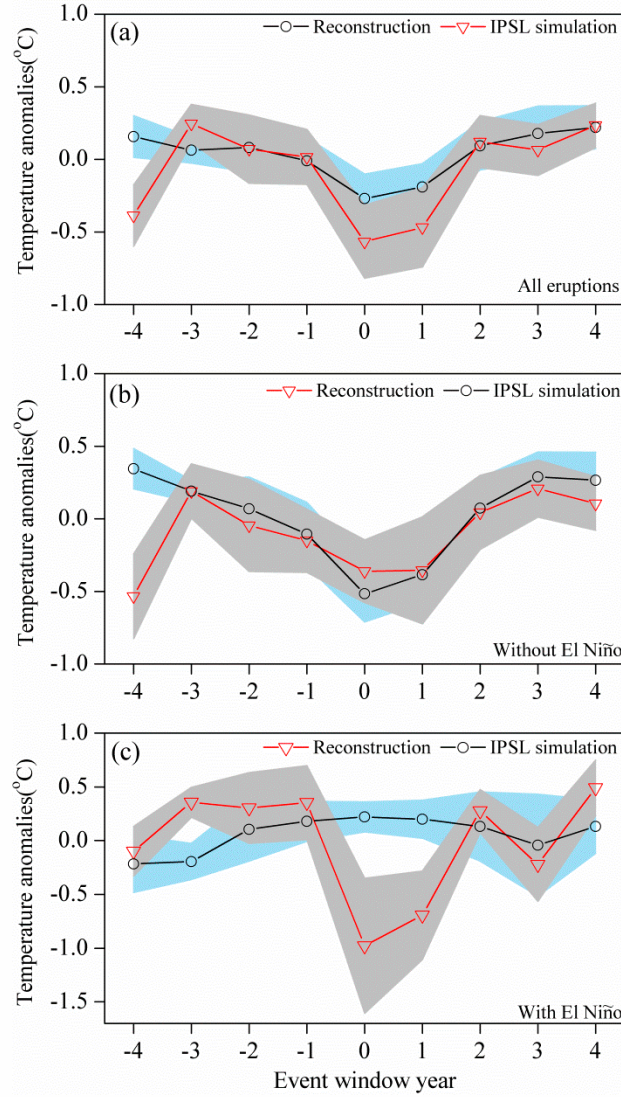

**Figure S3.** Comparisons between the composite magnitudes of post-volcanic August-September cooling over the TP derived from the tree-ring density-based reconstruction and simulation from IPSL model. The composite magnitude was based on (a) all the twelve large tropical eruptions, (b) the eight large tropical eruptions without El Niño associations and (c) the four large tropical eruptions accompanied by a subsequent El Niño event. Temperature anomalies in (a-c) are with respect to the preceding 5-year mean. The shaded areas denote the error bar (SE).

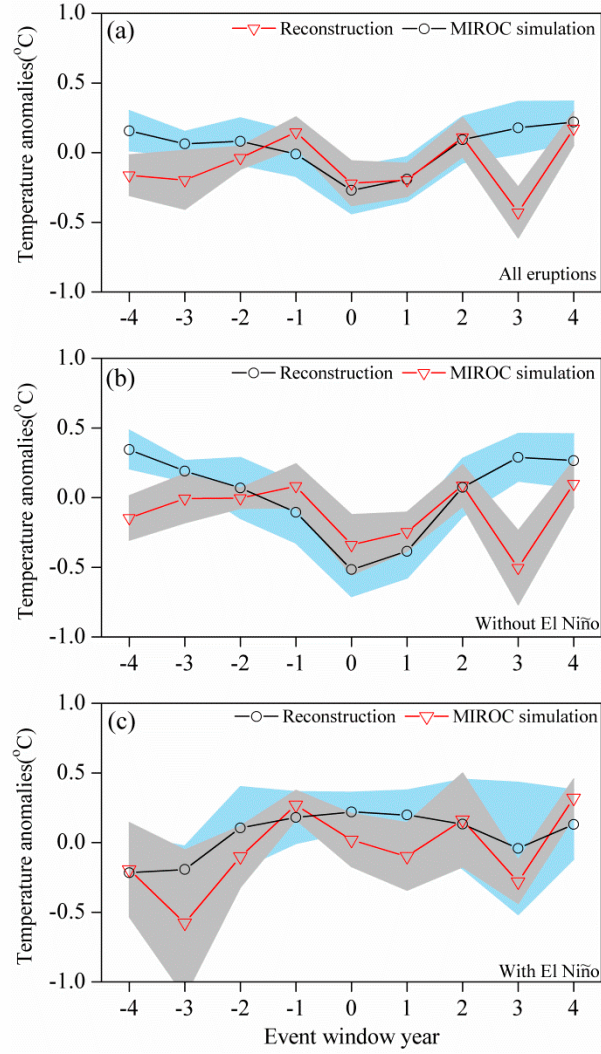

**Figure S4.** Comparisons between the composite magnitudes of post-volcanic August-September cooling over the TP derived from the tree-ring density-based reconstruction and simulation from MIROC model. The composite magnitude was based on (a) all the twelve large tropical eruptions, (b) the eight large tropical eruptions without El Niño associations and (c) the four large tropical eruptions accompanied by a subsequent El Niño event. Temperature anomalies in (a-c) are with respect to the preceding 5-year mean. The shaded areas denote the error bar (SE).

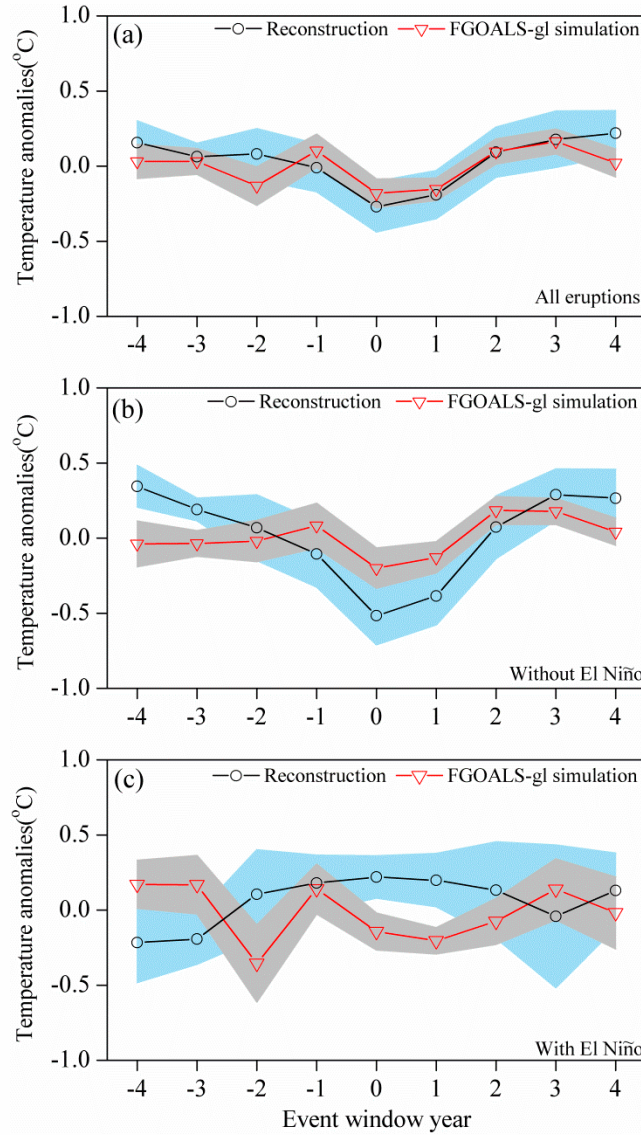

**Figure S5.** Comparisons between the composite magnitudes of post-volcanic August-September cooling over the TP derived from the tree-ring density-based reconstruction and simulation from FGOALS-gl model. The composite magnitude was based on (a) all the twelve large tropical eruptions, (b) the eight large tropical eruptions without El Niño associations and (c) the four large tropical eruptions accompanied by a subsequent El Niño event. Temperature anomalies in (a-c) are with respect to the preceding 5-year mean. The shaded areas denote the error bar (SE).



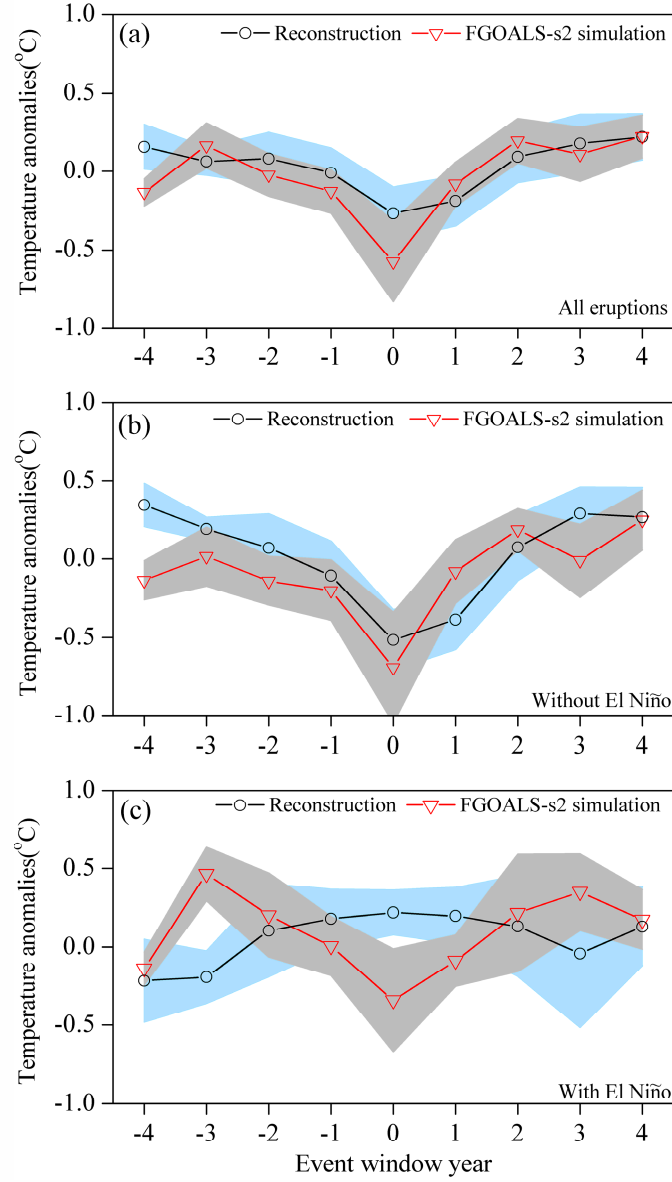

**Figure S6.** Comparisons between the composite magnitudes of post-volcanic August-September cooling over the TP derived from the tree-ring density-based reconstruction and simulation from FGOALS-s2 model. The composite magnitude was based on (a) all the twelve large tropical eruptions, (b) the eight large tropical eruptions without El Niño associations and (c) the four large tropical eruptions accompanied by a subsequent El Niño event. Temperature anomalies in (a-c) are with respect to the preceding 5-year mean. The shaded areas denote the error bar (SE).

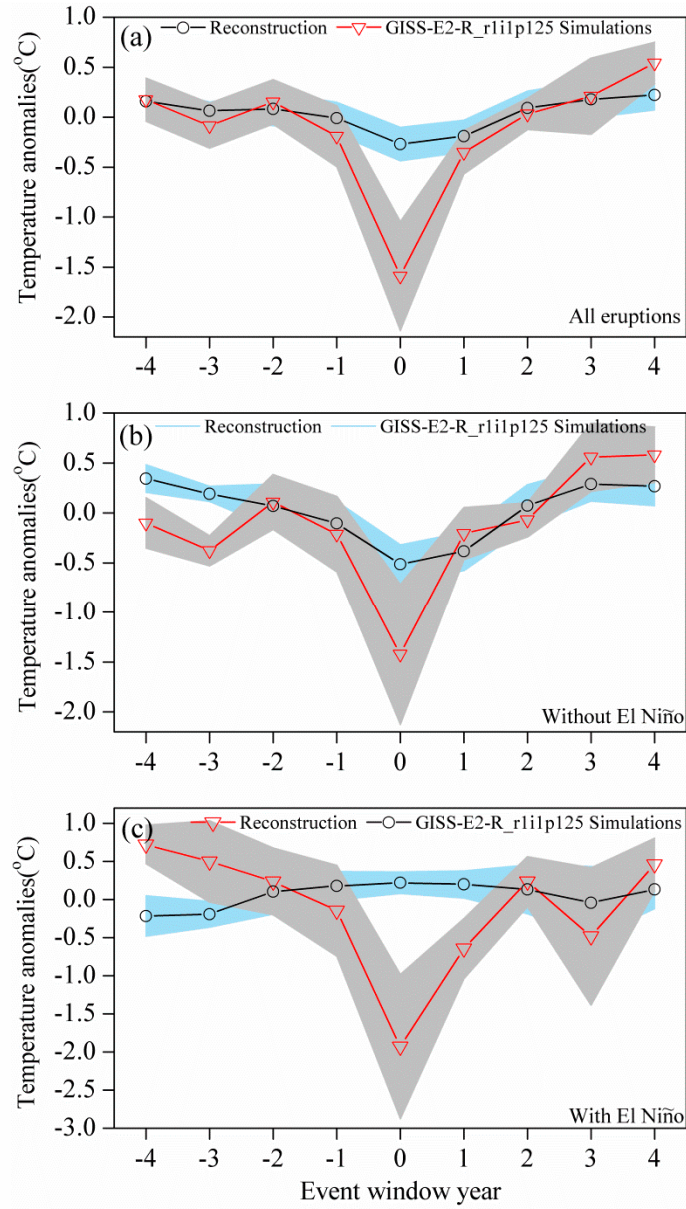

**Figure S7.** Comparisons between the composite magnitudes of post-volcanic August-September cooling over the TP derived from the tree-ring density-based reconstruction and simulation from GISS-E2-R-r1i1p125 model. The composite magnitude was based on (a) all the twelve large tropical eruptions, (b) the eight large tropical eruptions without El Niño associations and (c) the four large tropical eruptions accompanied by a subsequent El Niño event. Temperature anomalies in (a-c) are with respect to the preceding 5-year mean. The shaded areas denote the error bar (SE).

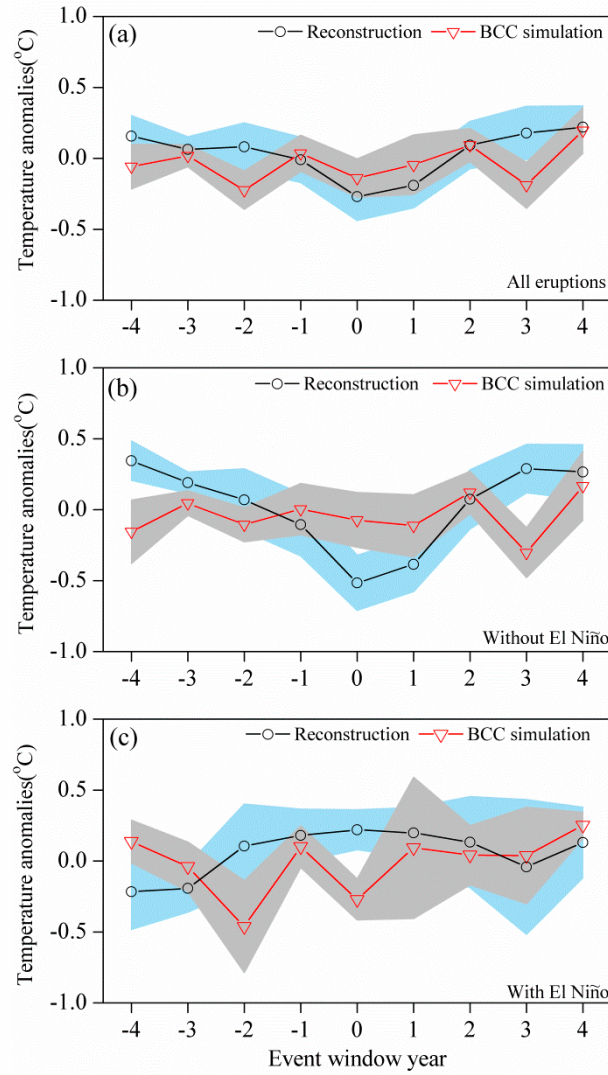

**Figure S8.** Comparisons between the composite magnitudes of post-volcanic August-September cooling over the TP derived from the tree-ring density-based reconstruction and simulation from BCC-CSM1.1 model. The composite magnitude was based on (a) all the twelve large tropical eruptions, (b) the eight large tropical eruptions without El Niño associations and (c) the four large tropical eruptions accompanied by a subsequent El Niño event. Temperature anomalies in (a-c) are with respect to the preceding 5-year mean. The shaded areas denote the error bar (SE).



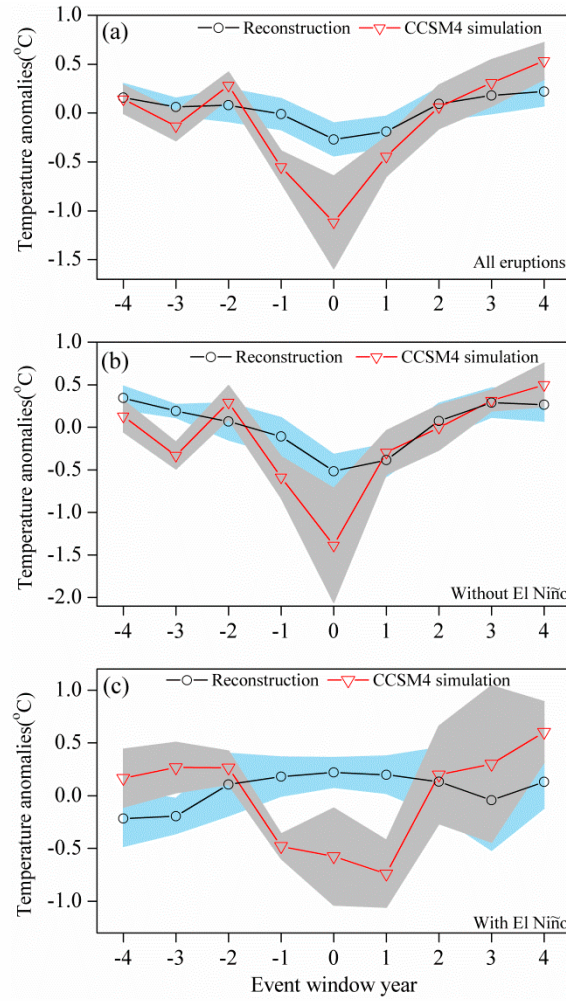

**Figure S9.** Comparisons between the composite magnitudes of post-volcanic August-September cooling over the TP derived from the tree-ring density-based reconstruction and simulation from CCSM4 model. The composite magnitude was based on **(a)** all the twelve large tropical eruptions, **(b)** the eight large tropical eruptions without El Niño associations and **(c)** the four large tropical eruptions accompanied by a subsequent El Niño event. Temperature anomalies in **(a-c)** are with respect to the preceding 5-year mean. The shaded areas denote the error bar (SE).
